# Supplementary material for: Kinesin-2 autoinhibition requires elbow phosphorylation
Source: eLife. 2025 Jun 11;13:RP103648. doi: 10.7554/eLife.103648 (PMC12158429; doi:10.7554/eLife.103648)
Supplement: Figure 3—source data 1. [file elife-103648-fig3-data1.xlsx]

## Sheet: Sheet1
fa_atr Lennard-Jones attractive between atoms in different residues. Supports canonical and noncanonical residue types.
fa_rep Lennard-Jones repulsive between atoms in different residues. Supports canonical and noncanonical residue types.
fa_sol Lazaridis-Karplus solvation energy. Supports canonical and noncanonical residue types.
fa_intra_rep Lennard-Jones repulsive between atoms in the same residue. Supports canonical and noncanonical residue types.
fa_elec Coulombic electrostatic potential with a distance-dependent dielectric. Supports canonical and noncanonical residue types.
pro_close Proline ring closure energy and energy of psi angle of preceding residue. Supports D- or L-proline, plus D- or L-oligourea-proline.
hbond_sr_bb Backbone-backbone hbonds close in primary sequence. All hydrogen bonding terms support canonical and noncanonical types.
hbond_lr_bb Backbone-backbone hbonds distant in primary sequence.
hbond_bb_sc Sidechain-backbone hydrogen bond energy.
hbond_sc Sidechain-sidechain hydrogen bond energy.
dslf_fa13 Disulfide geometry potential. Supports D- and L-cysteine disulfides, plus homocysteine disulfides or disulfides involving beta-3-cysteine.
rama Ramachandran preferences. Supports only the 20 canonical alpha-amino acids and their mirror images.
omega Omega dihedral in the backbone. A Harmonic constraint on planarity with standard deviation of ~6 deg. Supports alpha-amino acids, beta-amino acids, and oligoureas. In the case of oligoureas, both amide bonds (called "mu" and "omega" in Rosetta) are constarined to planarity.
fa_dun Internal energy of sidechain rotamers as derived from Dunbrack's statistics (2010 Rotamer Library used in Talaris2013). Supports any residue type for which a rotamer library is avalable.
p_aa_pp Probability of amino acid at Φ/Ψ. Supports only the 20 canonical alpha-amino acids and their mirror images.
ref Reference energy for each amino acid. Balances internal energy of amino acid terms. Plays role in design. Supports only the 20 canonical alpha-amino acids and their mirror images.
METHOD_WEIGHTS Not an energy term itself, but the parameters for each amino acid used by the ref energy term. A value is provided for each of the 20 canonical alpha-amino acids. The same value is applied for the equivalent mirror-image D-amino acid.
lk_ball Anisotropic contribution to the solvation. Supports arbitrary residue types.
lk_ball_iso Same as fa_sol; see below. Supports arbitrary residue types.
lk_ball_wtd weighted sum of lk_ball & lk_ball_iso (w1*lk_ball + w2*lk_ball_iso); w2 is negative so that anisotropic contribution(lk_ball) replaces some portion of isotropic contribution (fa_sol=lk_ball_iso). Supports arbitrary residue types.
lk_ball_bridge Bonus to solvation coming from bridging waters, measured by overlap of the "balls" from two interacting polar atoms. Supports arbitrary residue types.
lk_ball_bridge_uncpl Same as lk_ball_bridge, but the value is uncoupled with dGfree (i.e. constant bonus, whereas lk_ball_bridge is proportional to dGfree values). Supports arbitrary residue types.
fa_intra_atr_xover4 Intra-residue LJ attraction, counted for the atom-pairs beyond torsion-relationship. Supports arbitrary residues types.
fa_intra_rep_xover4 Intra-residue LJ repulsion, counted for the atom-pairs beyond torsion-relationship. Supports arbitrary residues types.
fa_intra_sol_xover4 Intra-residue LK solvation, counted for the atom-pairs beyond torsion-relationship. Supports arbitrary residues types.
fa_intra_elec Intra-residue Coulombic interaction, counted for the atom-pairs beyond torsion-relationship. Supports arbitrary residues types.
rama_prepro Backbone torsion preference term that takes into account of whether preceding amono acid is Proline or not. Currently supports the 20 canonical alpha-amino acids, their mirror-image D-amino acids, oligoureas, and N-methyl amino acids. Arbitrary new building-blocks can also be supported provided that an N-dimensional mainchain potential can be generated somehow.
hxl_tors Sidechain hydroxyl group torsion preference for Ser/Thr/Tyr, supersedes yhh_planarity (that covers L- and D-Tyr only).

## Sheet: Sheet2
fa_atr Lennard-Jones attractive between atoms in different residues. Supports canonical and noncanonical residue types.
fa_rep Lennard-Jones repulsive between atoms in different residues. Supports canonical and noncanonical residue types.
fa_sol Lazaridis-Karplus solvation energy. Supports canonical and noncanonical residue types.
fa_intra_rep Lennard-Jones repulsive between atoms in the same residue. Supports canonical and noncanonical residue types.
fa_elec Coulombic electrostatic potential with a distance-dependent dielectric. Supports canonical and noncanonical residue types.
pro_close Proline ring closure energy and energy of psi angle of preceding residue. Supports D- or L-proline, plus D- or L-oligourea-proline.
hbond_sr_bb Backbone-backbone hbonds close in primary sequence. All hydrogen bonding terms support canonical and noncanonical types.
hbond_lr_bb Backbone-backbone hbonds distant in primary sequence.
hbond_bb_sc Sidechain-backbone hydrogen bond energy.
hbond_sc Sidechain-sidechain hydrogen bond energy.
dslf_fa13 Disulfide geometry potential. Supports D- and L-cysteine disulfides, plus homocysteine disulfides or disulfides involving beta-3-cysteine.
omega Omega dihedral in the backbone. A Harmonic constraint on planarity with standard deviation of ~6 deg. Supports alpha-amino acids, beta-amino acids, and oligoureas. In the case of oligoureas, both amide bonds (called "mu" and "omega" in Rosetta) are constarined to planarity.
fa_dun Internal energy of sidechain rotamers as derived from Dunbrack's statistics (2010 Rotamer Library used in Talaris2013). Supports any residue type for which a rotamer library is avalable.
p_aa_pp Probability of amino acid at Φ/Ψ. Supports only the 20 canonical alpha-amino acids and their mirror images.
ref Reference energy for each amino acid. Balances internal energy of amino acid terms. Plays role in design. Supports only the 20 canonical alpha-amino acids and their mirror images.
lk_ball_wtd weighted sum of lk_ball & lk_ball_iso (w1*lk_ball + w2*lk_ball_iso); w2 is negative so that anisotropic contribution(lk_ball) replaces some portion of isotropic contribution (fa_sol=lk_ball_iso). Supports arbitrary residue types.
fa_intra_sol_xover4 Intra-residue LK solvation, counted for the atom-pairs beyond torsion-relationship. Supports arbitrary residues types.
rama_prepro Backbone torsion preference term that takes into account of whether preceding amono acid is Proline or not. Currently supports the 20 canonical alpha-amino acids, their mirror-image D-amino acids, oligoureas, and N-methyl amino acids. Arbitrary new building-blocks can also be supported provided that an N-dimensional mainchain potential can be generated somehow.

## Sheet: Sheet3
Figure 3-source data 1. Summary of energy terms in Rosetta Energy Function, corresponding to Fig.3 (B-C)
This table explains the terms used in the analysis in Fig.3(B-C). Modified from Alford et al., J Chem. Theory. Comput., 2017
Term	Description
fa_atr	Attractive energy between two atoms on different residues separated by a distance d
fa_rep	Repulsive energy between two atoms on different residues separated by a distance d
fa_sol	Gaussian exclusion implicit solvation energy between protein atoms in different residues
fa_intra_rep	Repulsive energy between two atoms on the same residue separated by a distance d
fa_intra_sol	Gaussian exclusion implicit solvation energy between protein atoms in the same residue
lk_ball_wtd	Orientation-dependent solvation of polar atoms assuming ideal water geometry
fa_elec	Energy of interaction between two nonbonded charged atoms separated by a distance d
pro_close	Penalty for an open proline ring and proline ω bonding energy
hbond_sr_bb	Energy of long-range hydrogen bonds
hbond_lr_bb	Energy of short-range hydrogen bonds
hbond_bb_sc	Energy of backbone−side-chain hydrogen bonds
hbond_sc	Energy of side-chain−side-chain hydrogen bonds
dslf_fa13	Energy of disulfide bridges
omega	Backbone-dependent penalty for cis ω dihedrals that deviate from 0° and trans ω dihedrals that deviate from 180°
fa_dun	Probability that a chosen rotamer is native-like given backbone ϕ, ψ angles
p_aa_pp	Probability of amino acid identity given backbone ϕ, ψ angles
yhh_planarity	Sinusoidal penalty for nonplanar tyrosine χ3 dihedral angle
ref	Reference energies for amino acid types
rama_prepro	Probability of backbone ϕ, ψ angles given the amino acid type
